# Supplementary material for: Naphthalene diimide–diketopyrrolopyrrole copolymers as non-fullerene acceptors for use in bulk-heterojunction all-polymer UV–NIR photodetectors
Source: Royal Society of Chemistry journal article supplement (doi:10.1039/c6py01828a), 2016-11-21
Supplement: c6py01828a1.pdf [file c6py01828a1.pdf]

## Supporting Information

### **Naphthalene Diimide–Diketopyrrolopyrrole Copolymers as Non-Fullerene Acceptors for Use in Bulk-Heterojunction All-Polymer UV–NIR Photodetectors**

Liuyong Hu<sup>‡a,b</sup>, Wenqiang Qiao<sup>‡\*,a</sup>, Jinfeng Han<sup>a,b</sup>, Xiaokang Zhou<sup>a,b</sup>, Canglong Wang<sup>c</sup>,  
Dongge Ma<sup>a</sup>, Zhi Yuan Wang<sup>\*,a,d</sup>, and Yuning Li<sup>e</sup>

<sup>a</sup> State Key Laboratory of Polymer Physics and Chemistry, Changchun Institute of Applied Chemistry, Chinese Academy of Sciences, Changchun 130022, P. R. China

<sup>b</sup> University of Chinese Academy of Sciences, Beijing 100049, P. R. China

<sup>c</sup> Institute of Modern Physics, Chinese Academy of Science, Lanzhou 730000, P. R. China

<sup>d</sup> Department of Chemistry, Carleton University, 1125 Colonel By Drive, Ottawa, Ontario, Canada K1S 5B6

<sup>e</sup> Department of Chemical Engineering and Waterloo Institute for Nanotechnology, University of Waterloo, 200 University Avenue West, Waterloo, Ontario, Canada N2L 3G1

<sup>‡</sup> Equal contribution

\*E-mail: wayne\_wang@carleton.ca (Z. Y. W.)

\*E-mail: wqqiao@ciac.ac.cn (W. Q.)

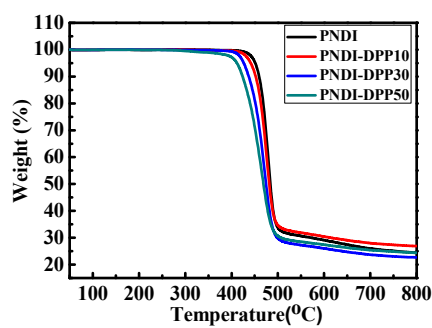

**Figure S1.** TGA thermograms of polymers under nitrogen flow.

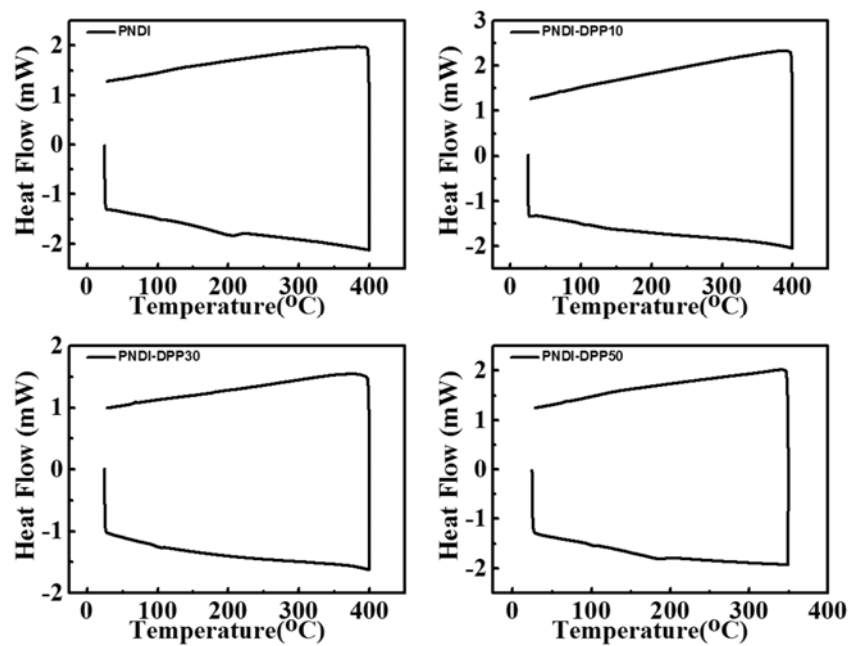

**Figure S2.** The second heating and cooling DSC scans of polymers under nitrogen flow.

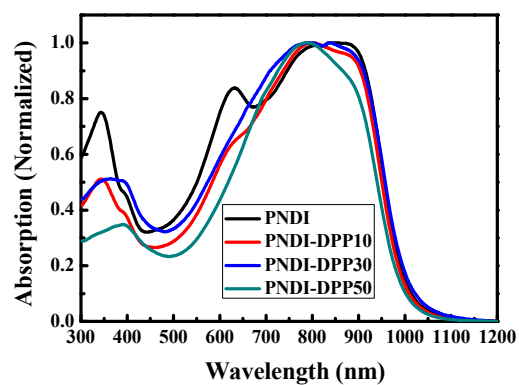

**Figure S3.** Absorption of the films of polymer blends spin-coated on glass.

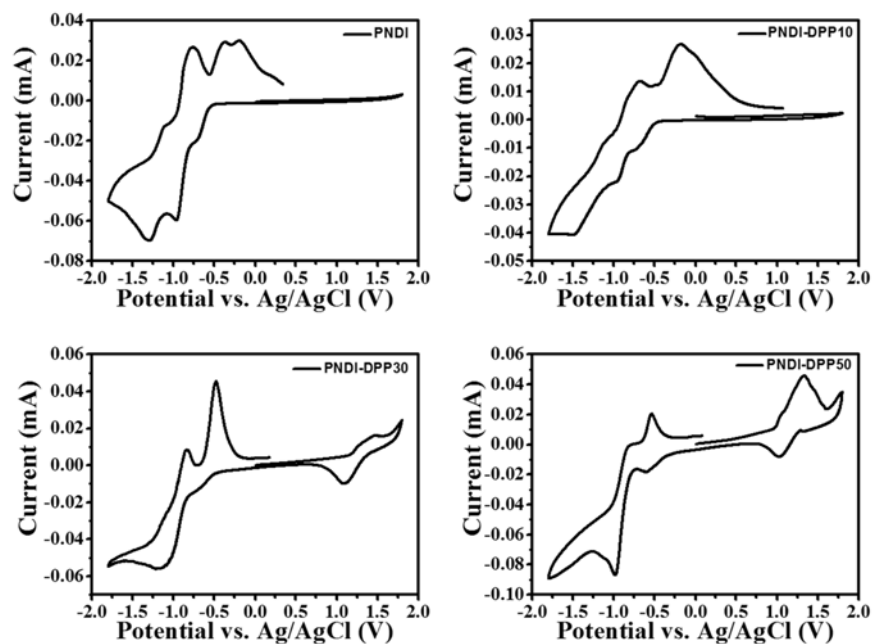

**Figure S4.** Cyclic voltammograms of polymer films on Pt electrode in 0.1 M *n*-Bu<sub>4</sub>NPF<sub>6</sub> solution in dry acetonitrile with a scan rate of 50 mV/s.

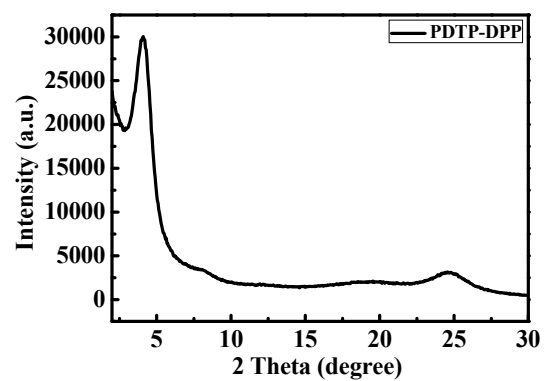

**Figure S5.** The out-of-plane GIXRD diagram of PDTP-DPP

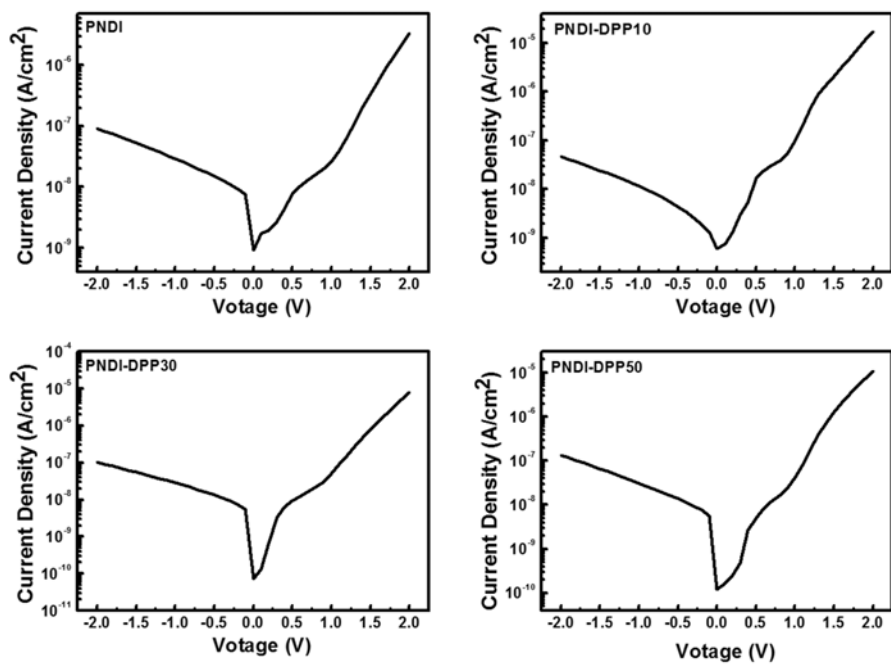

**Figure S6.** Current density-voltage characteristics of polymer photodetectors in dark.

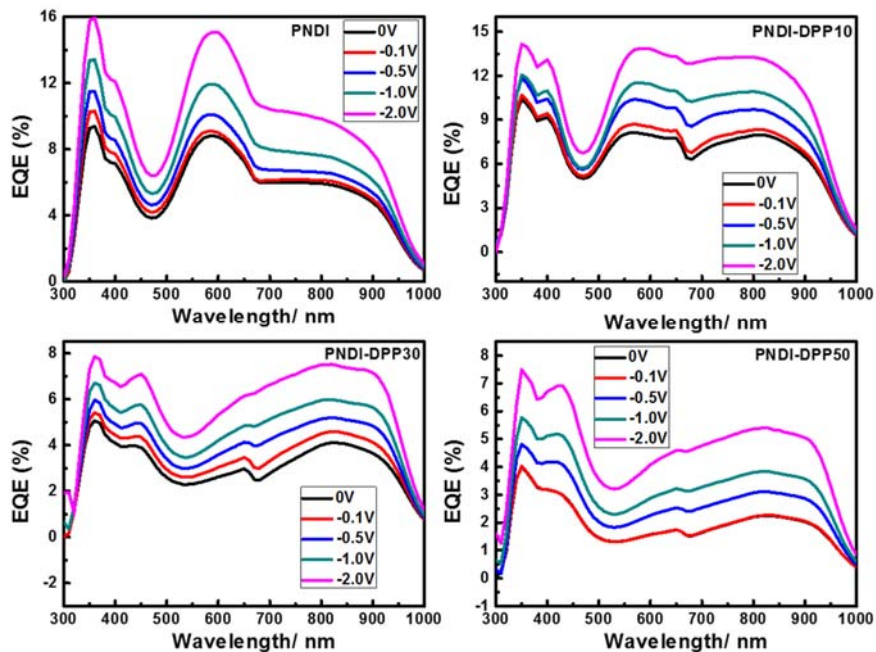

Figure S7. Spectral EQE of polymer photodetectors at different biases.

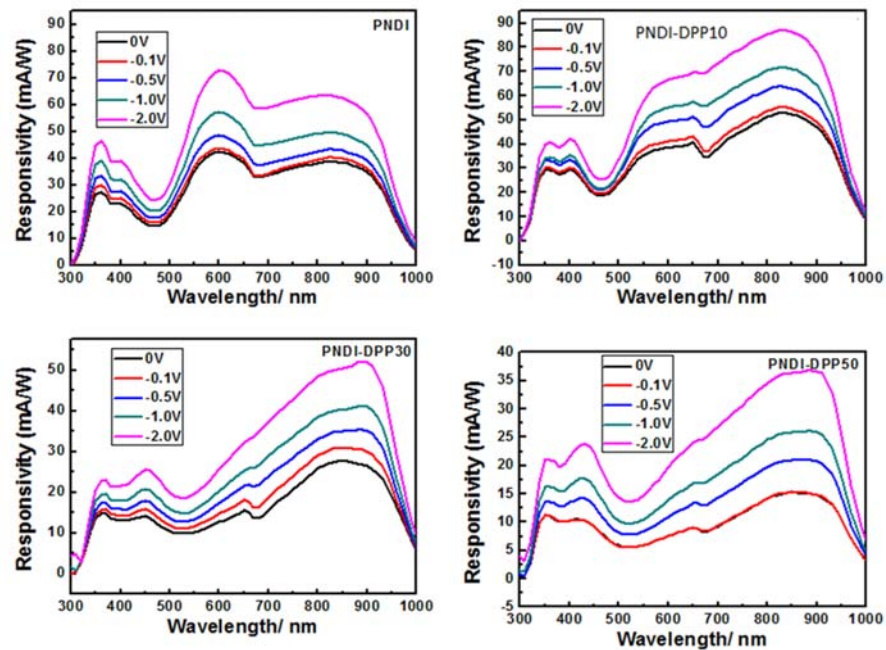

Figure S8. Spectral responsivity of polymer photodetectors at different biases.

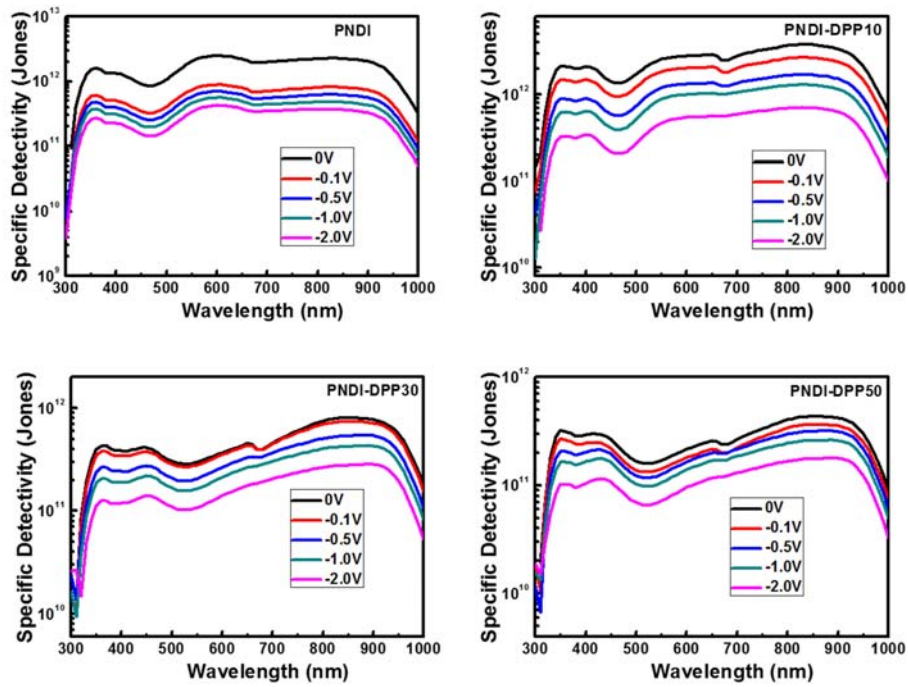

**Figure S9.** Specific detectivity of polymer photodetectors at different biases.

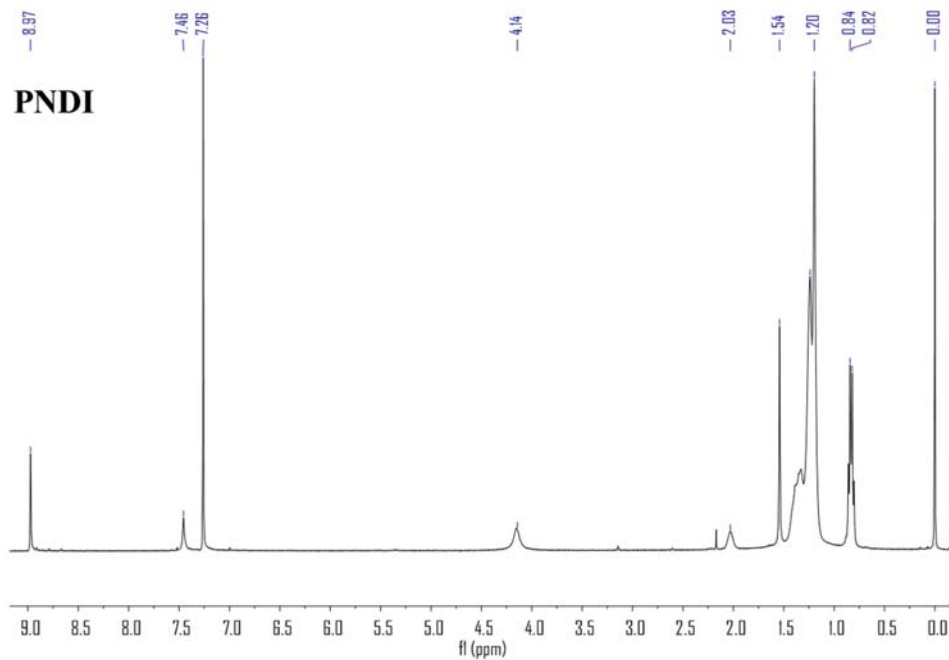

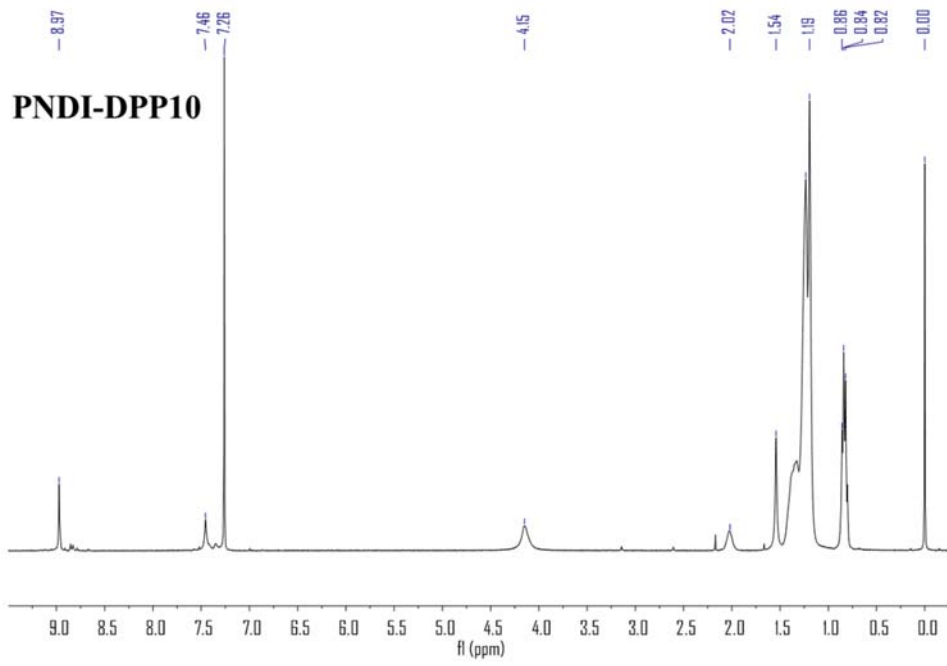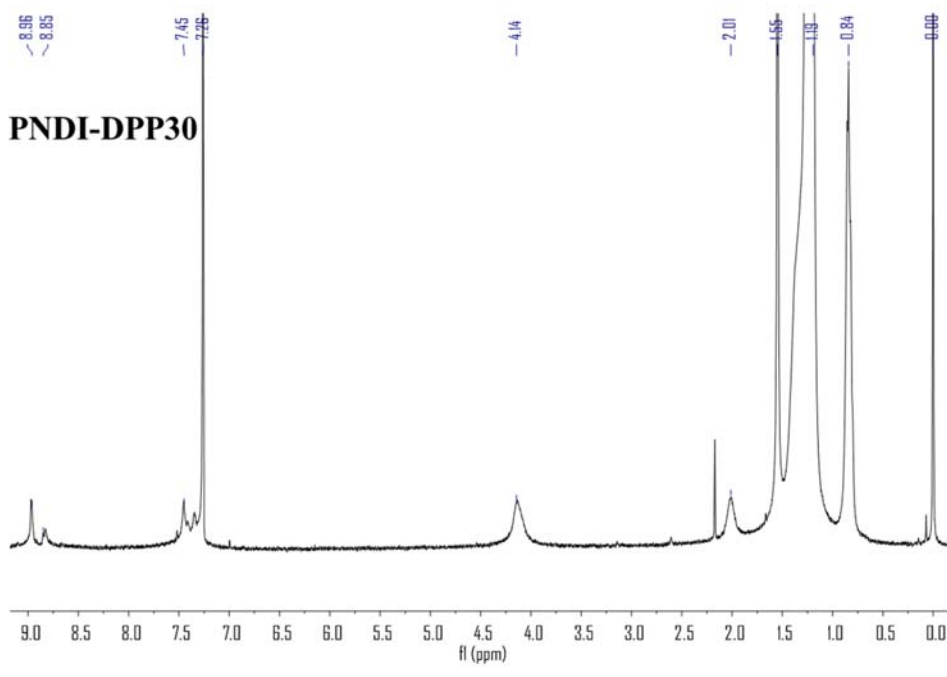

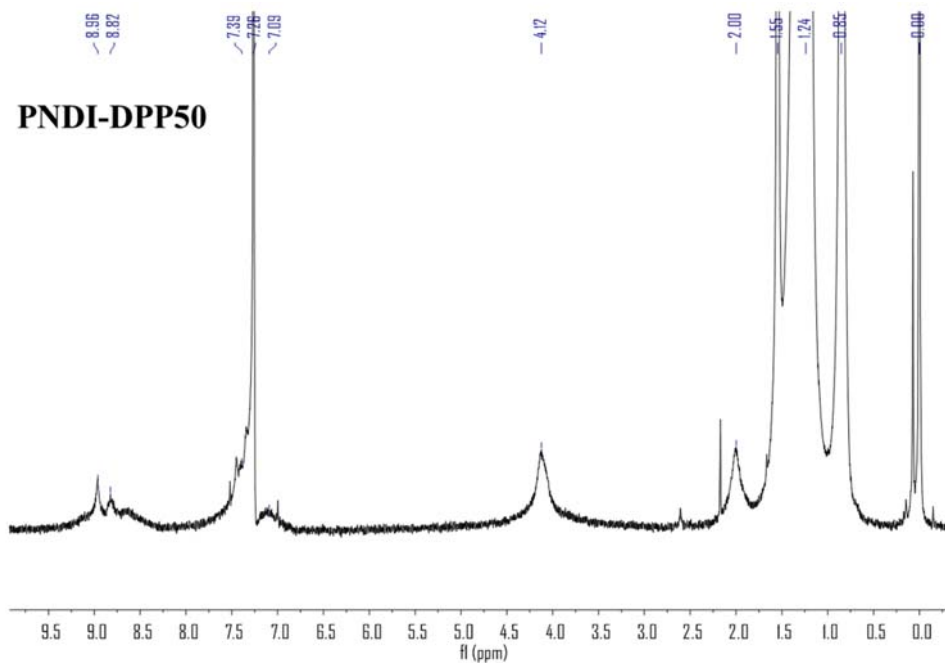

**Figure S10.**  $^1\text{H}$ -NMR spectra of polymers in  $\text{CDCl}_3$  at room temperature.

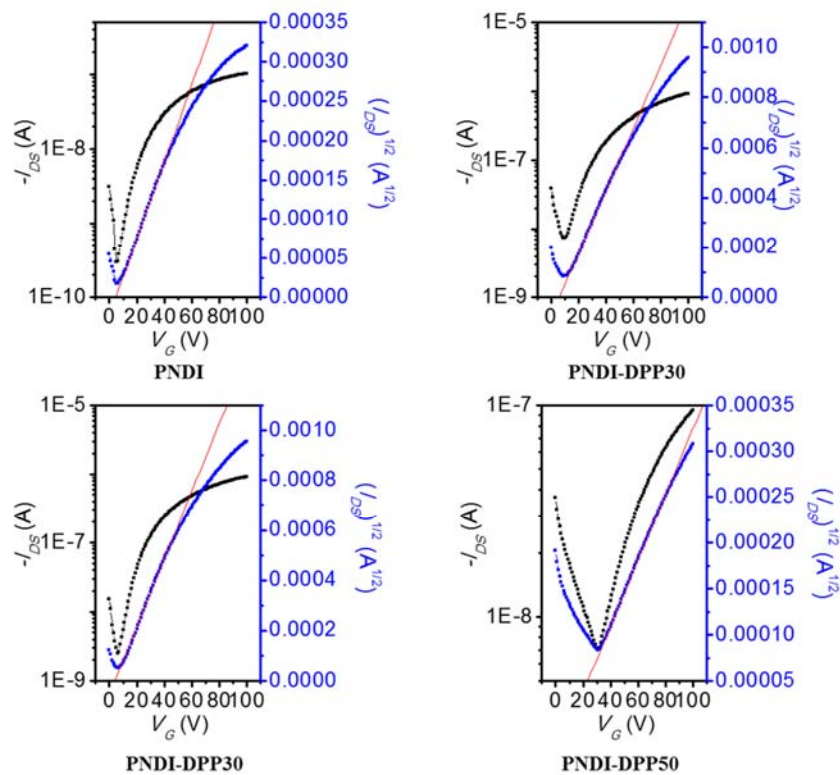



**Figure S11.** Transfer curves of polymer field-effect transistors.

**Table S1.** Characteristics of polymer transistors.

| Polymer    | $\mu_e$ (cm <sup>2</sup> V <sup>-1</sup> s <sup>-1</sup> ) | $V_{th}$ (V) | $I_{on}/I_{off}$ |
|------------|------------------------------------------------------------|--------------|------------------|
| PNDI       | $1.6 \times 10^{-4}$                                       | 5            | $10^3$           |
| PNDI-DPP10 | $1.0 \times 10^{-3}$                                       | 5            | $10^2$           |
| PNDI-DPP30 | $1.2 \times 10^{-3}$                                       | 4            | $10^3$           |
| PNDI-DPP50 | $8.5 \times 10^{-4}$                                       | 24           | $10^2$           |
